# Supplementary material for: Constructing interfacial structure of Mo5N6/Ni3N/Ni/NF for efficient and stable electrocatalytic hydrogen evolution under alkaline conditions
Source: Royal Society of Chemistry journal article supplement (doi:10.1039/d3se01601c), 2024-01-01
Supplement: d3se01601c1.pdf [file d3se01601c1.pdf]

## Supporting Information

# Constructing interface structure of $\text{Mo}_5\text{N}_6/\text{Ni}_3\text{N}/\text{Ni}/\text{NF}$ for efficient and stable electrocatalytic hydrogen evolution under alkaline conditions

Yang Zhou <sup>a, b, #</sup>, Jing Zhou <sup>a, #</sup>, Muzaffar Ahmad Boda <sup>b</sup>, Kunfeng Zhao <sup>b</sup>, Haojie Ma <sup>b</sup>, Chenhao Shi <sup>b</sup>, Dingwang Yuan <sup>a, \*</sup>, Zhiguo Yi <sup>b, \*</sup>

<sup>a</sup> College of Materials Science and Engineering, Hunan University, Changsha 410082, China.

<sup>b</sup> State Key Lab of High Performance Ceramics and Superfine Microstructure, Shanghai Institute of Ceramics, Chinese Academy of Sciences, Shanghai 201899, China.

<sup>#</sup> These authors contributed equally to this study.

E-mail address: [zhiguo@mail.sic.ac.cn](mailto:zhiguo@mail.sic.ac.cn) (Zhiguo Yi), [dwyuan@hnu.edu.cn](mailto:dwyuan@hnu.edu.cn) (Dingwang Yuan)

## Chemicals and materials

Nickel chloride anhydrous ( $\text{NiCl}_2$ , Ni > 42.0%), ammonium chloride ( $\text{NH}_4\text{Cl}$ , 99.0%), sodium molybdate dihydrate ( $\text{Na}_2\text{MoO}_4 \cdot 2\text{H}_2\text{O}$ , 99.0%+), potassium hydroxide (KOH,  $\geq 90.0\%$ ) purchased from Shanghai Titan Scientific Co. LTD ([www.tansoole.com](http://www.tansoole.com)). Ethanol absolute ( $\text{C}_2\text{H}_6\text{O}$ ,  $\geq 99.7\%$ ) and acetone ( $\text{C}_3\text{H}_6\text{O}$ ,  $\geq 99.5\%$ ) purchased from Shanghai Lingfeng Chemical Reagent Co. LTD ([www.yonghuachem.com](http://www.yonghuachem.com)). Hydrochloric acid ( $\text{HCl}$ , 36.0~38.0%) purchased from [www.reagent.com.cn](http://www.reagent.com.cn). All of the reagents were used as received without further purification. Deionized water was used throughout the experiments.

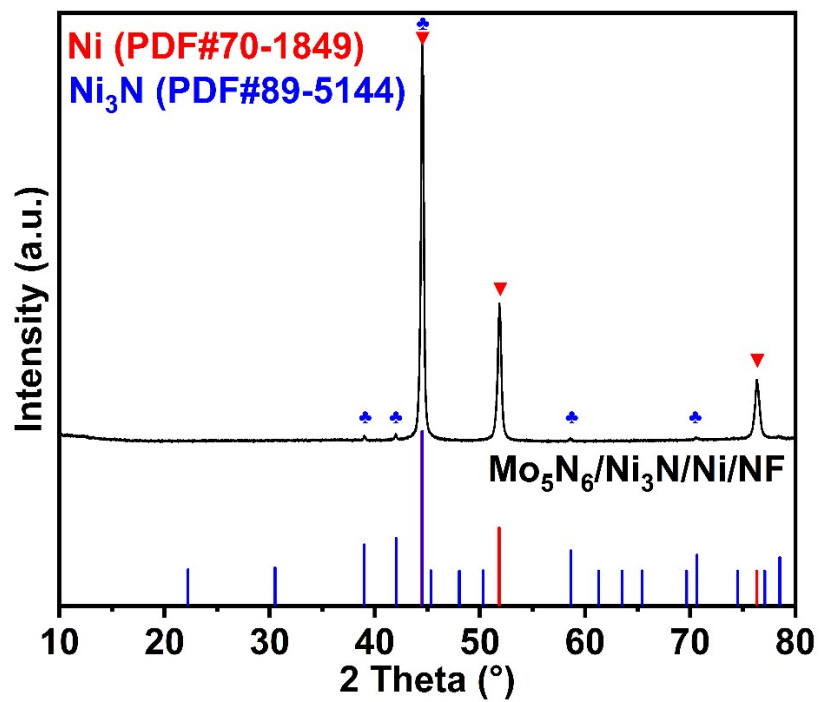

Fig. S1. XRD pattern of the  $\text{Mo}_5\text{N}_6/\text{Ni}_3\text{N}/\text{Ni}/\text{NF}$ .

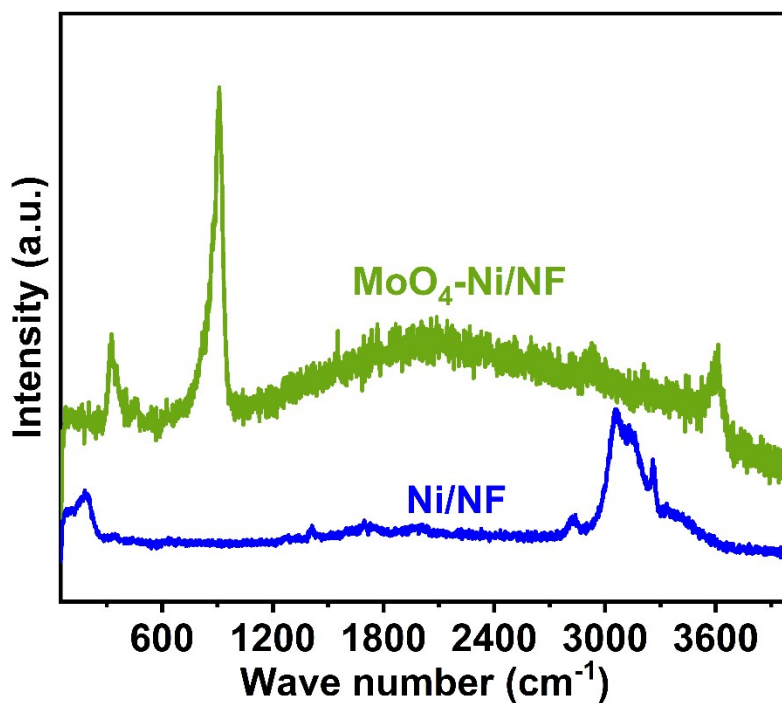

Fig. S2 Raman spectra of Ni/NF and  $\text{MoO}_4\text{-Ni}/\text{NF}$ .

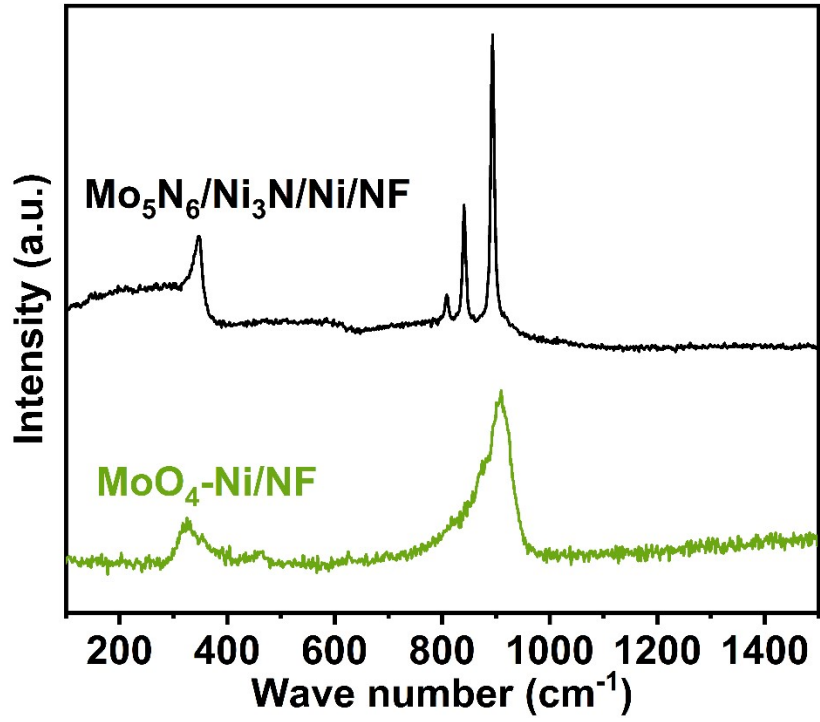

**Fig. S3** Raman spectra of MoO<sub>4</sub>-Ni/NF and Mo<sub>5</sub>N<sub>6</sub>/Ni<sub>3</sub>N/Ni/NF.

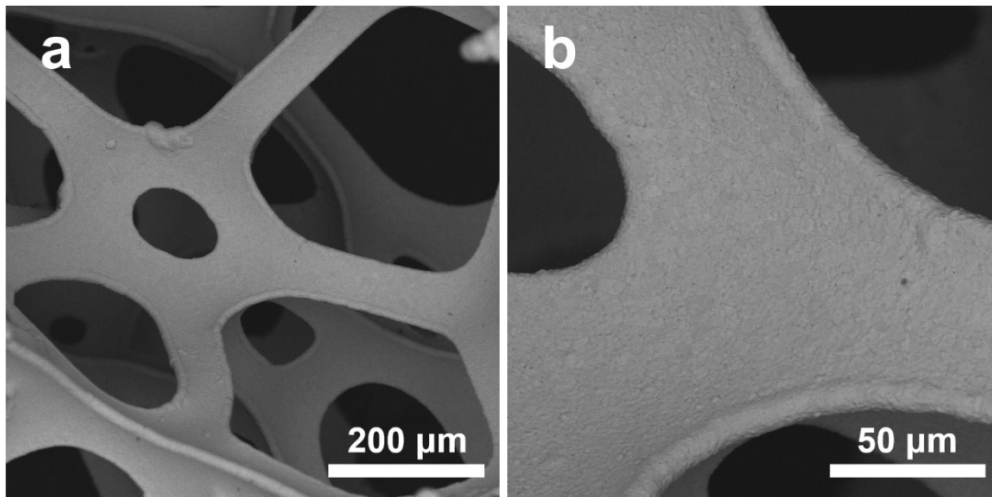

**Fig. S4.** SEM images of the commercial Ni foam.

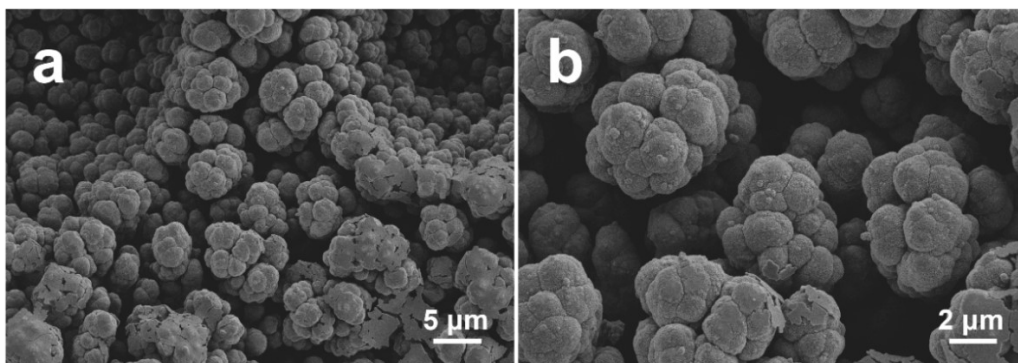

**Fig. S5.** Low-magnification SEM images of Ni/NF.

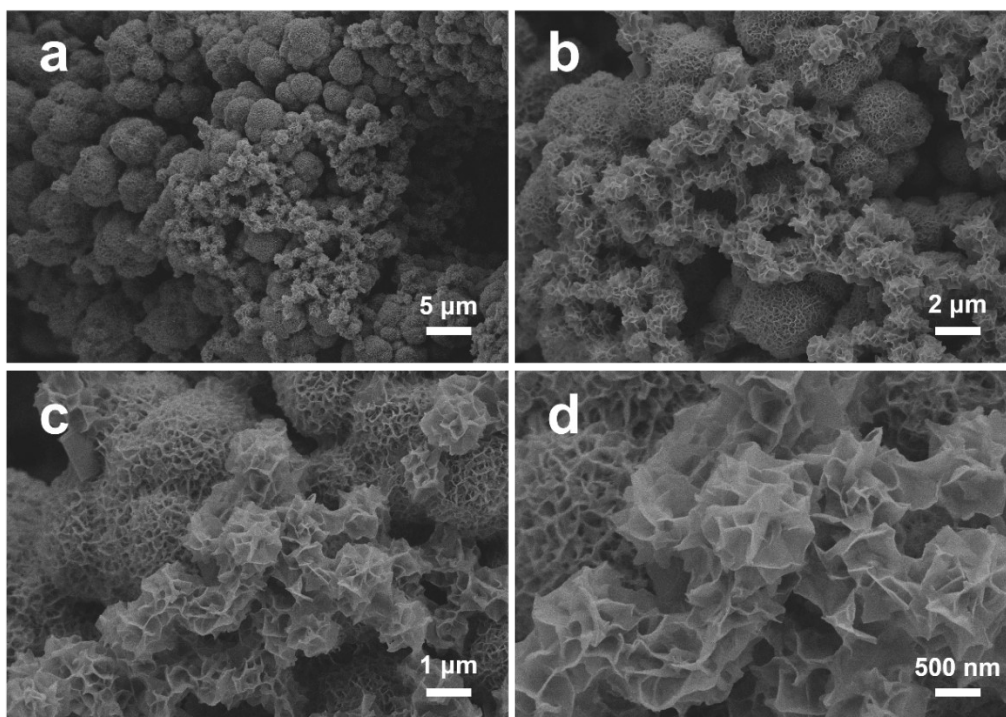

**Fig. S6.** Low-magnification SEM images of MoO<sub>4</sub>-Ni/NF.

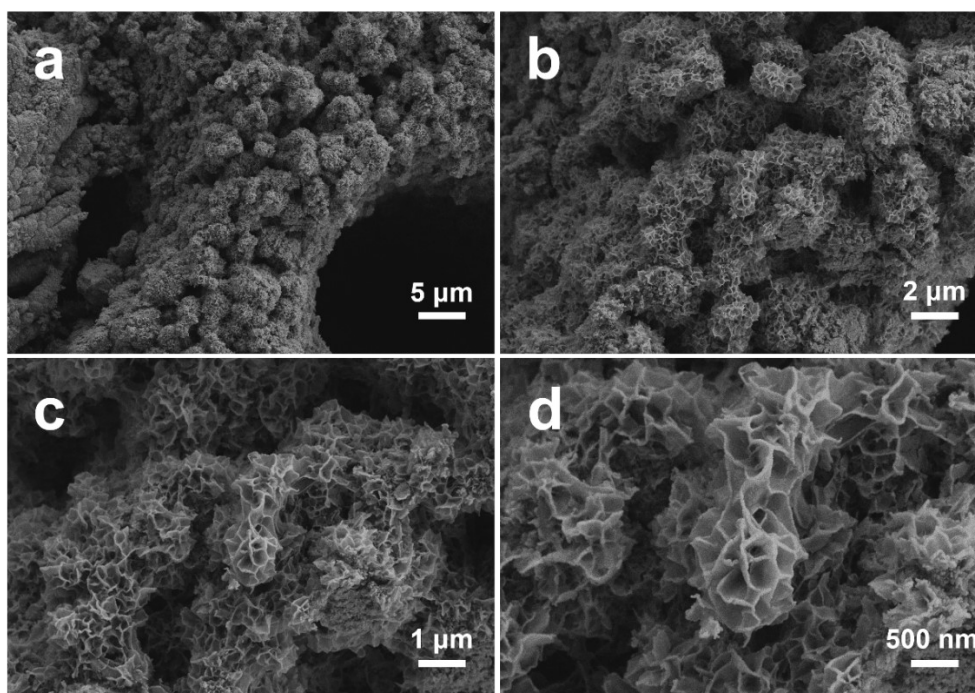

**Fig. S7.** Low-magnification SEM images of  $\text{Mo}_5\text{N}_6/\text{Ni}_3\text{N}/\text{Ni}/\text{NF}$ .

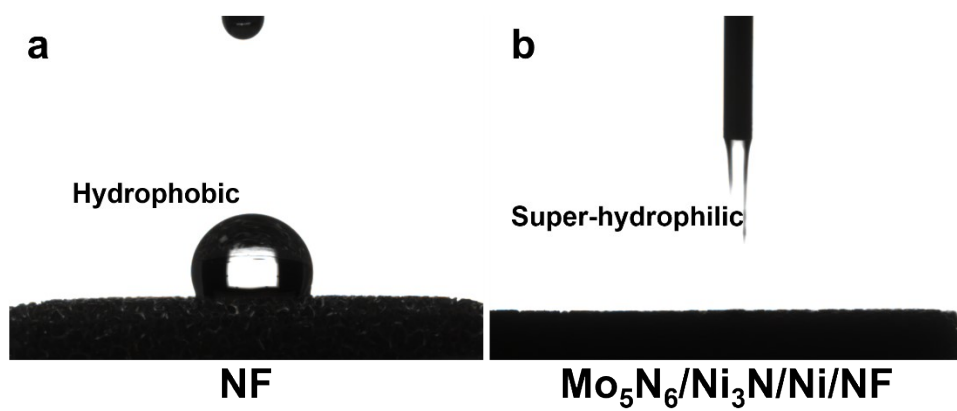

**Fig. S8.** Photographs of contact angle of the (a) NF and (b)  $\text{Mo}_5\text{N}_6/\text{Ni}_3\text{N}/\text{Ni}/\text{NF}$ .

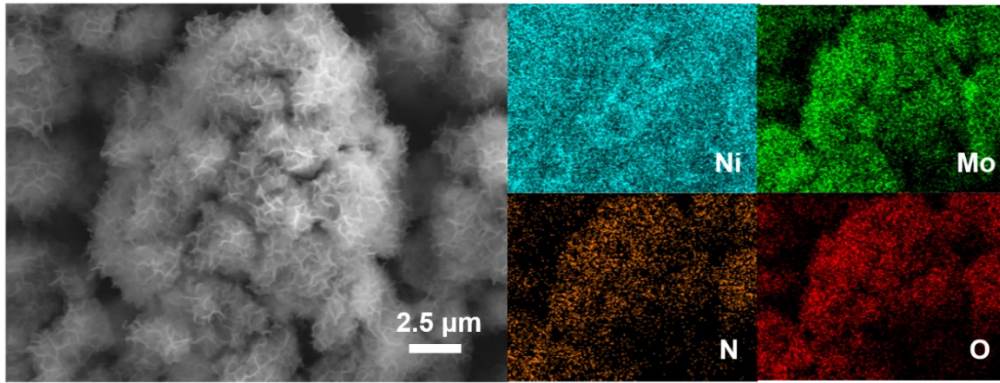

**Fig. S9.** The scanning electron microscopy image and the corresponding elemental mappings of Ni, Mo, N, and O in the  $\text{Mo}_5\text{N}_6/\text{Ni}_3\text{N}/\text{Ni}/\text{NF}$ .

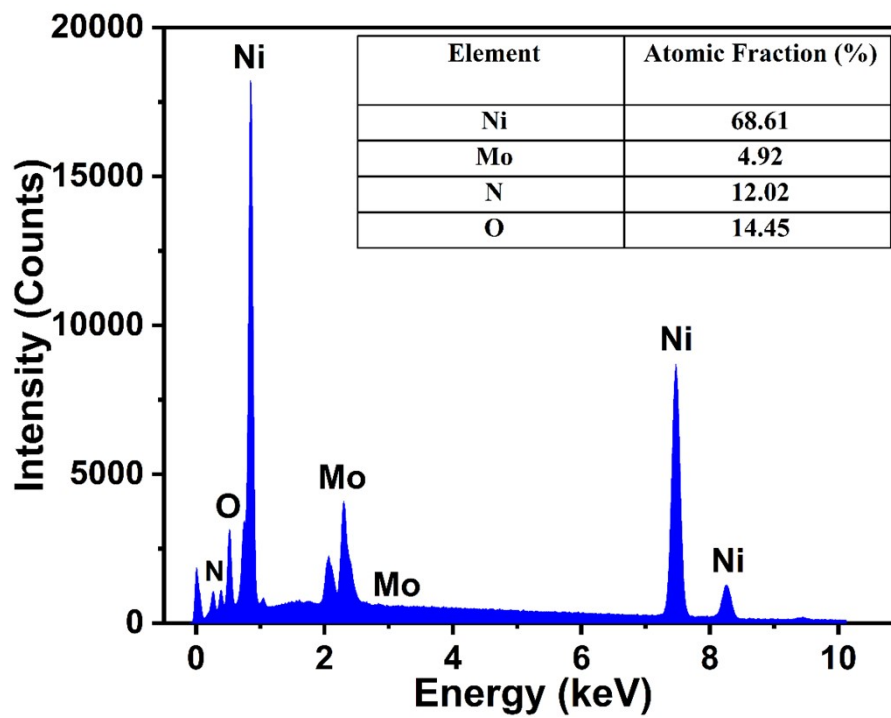

**Fig. S10.** EDS spectrum of  $\text{Mo}_5\text{N}_6/\text{Ni}_3\text{N}/\text{Ni}/\text{NF}$  sample (inset is the ratio of Ni, Mo, N, O).

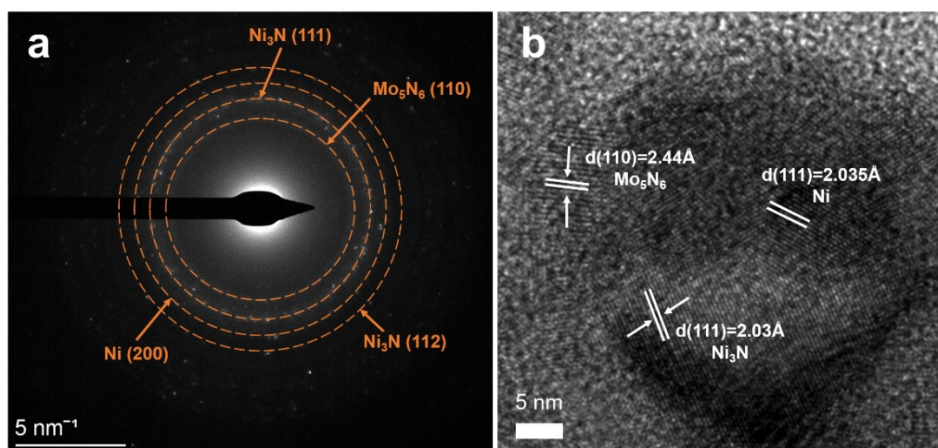

**Fig. S11.** (a, b) More detailed SAED pattern information of  $\text{Mo}_5\text{N}_6/\text{Ni}_3\text{N}/\text{Ni}/\text{NF}$  and HRTEM image.

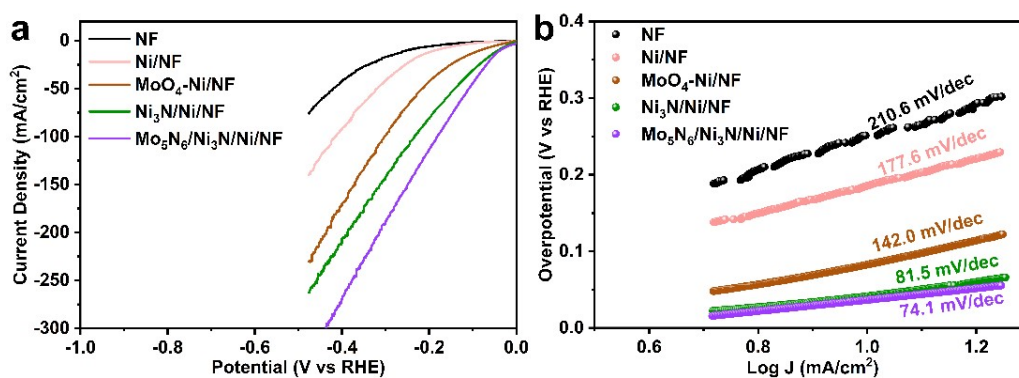

**Fig. S12.** (a) LSV polarization curves and (b) the corresponding Tafel plots of the as-prepared catalysts without IR-correction.



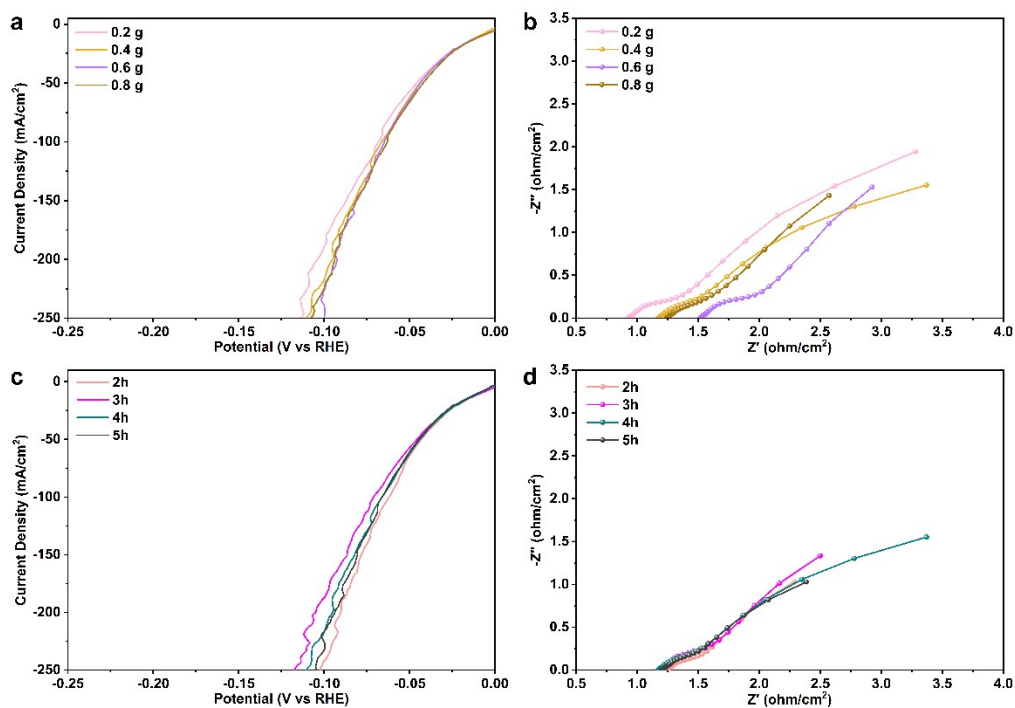

**Fig. S13.** (a, b) LSV polarization curves and the corresponding Nyquist plots of the  $\text{Mo}_5\text{N}_6/\text{Ni}_3\text{N}/\text{Ni}/\text{NF}$  which prepared by different concentrations of  $\text{Na}_2\text{MoO}_4 \cdot 2\text{H}_2\text{O}$  in hydrothermal reaction. (c, d) LSV polarization curves and the corresponding Nyquist plots of the  $\text{Mo}_5\text{N}_6/\text{Ni}_3\text{N}/\text{Ni}/\text{NF}$  which prepared by different nitridation time.

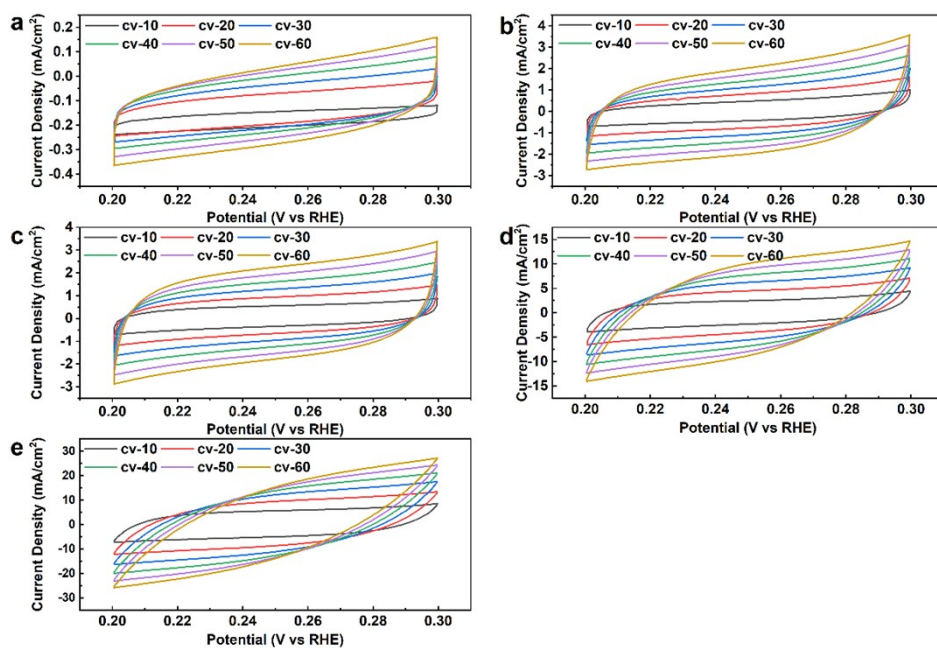

**Fig. S14.** CV curves of the (a) blank Ni foam; (b) Ni/NF; (c) MoO<sub>4</sub>-Ni/NF; (d) Ni<sub>3</sub>N/Ni/NF; (e) Mo<sub>5</sub>N<sub>6</sub>/Ni<sub>3</sub>N/Ni/NF tested at different scan rates.

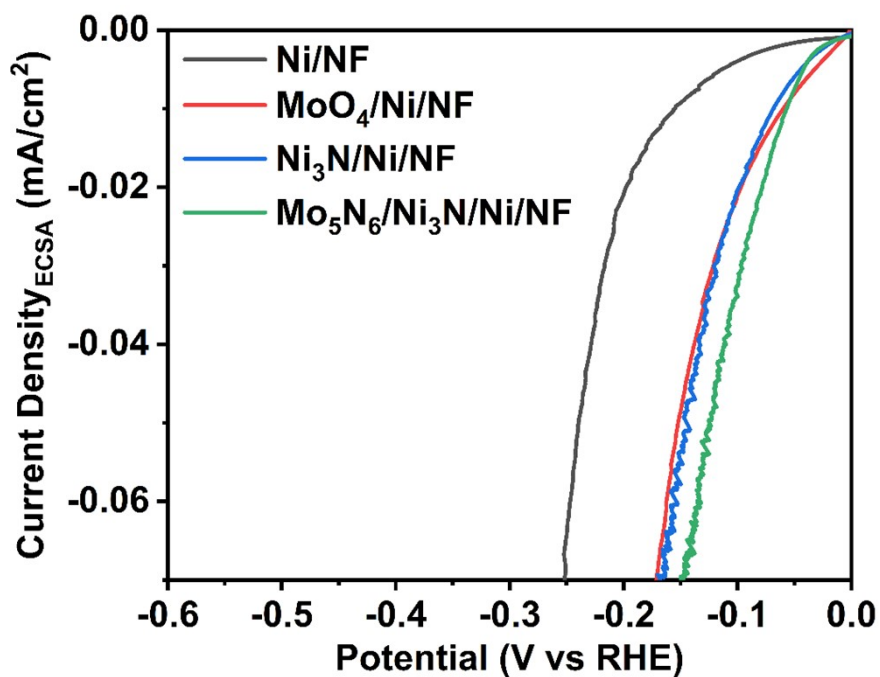

**Fig. S15.** The LSV curves of Mo<sub>5</sub>N<sub>6</sub>/Ni<sub>3</sub>N/Ni/NF, MoO<sub>4</sub>-Ni/NF, Ni<sub>3</sub>N/Ni/NF and Ni/NF normalized to ECSA.

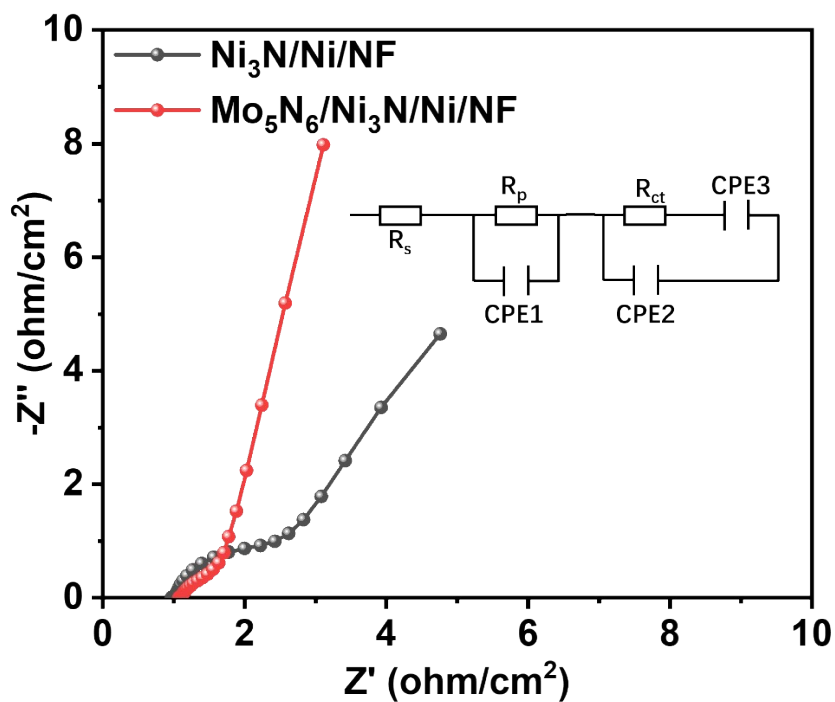

**Fig. S16.** The Nyquist plots of  $\text{Ni}_3\text{N}/\text{Ni}/\text{NF}$  and  $\text{Mo}_5\text{N}_6/\text{Ni}_3\text{N}/\text{Ni}/\text{NF}$  which performed at OCV. Inset: equivalent circuit model.

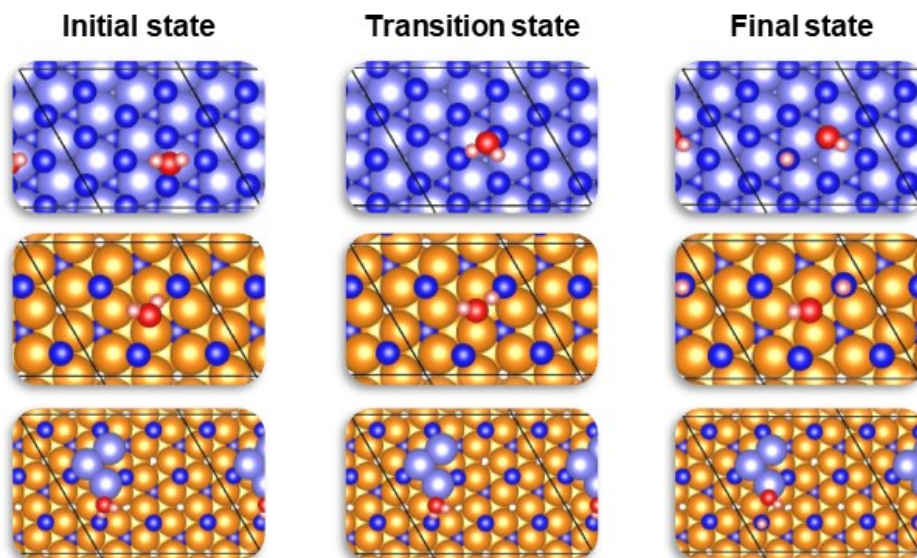

**Fig. S17.** Initial, transition and final states for water decomposition. Orange, pink, blue, and purple atoms represent Ni, H, N, and Mo atoms, respectively.

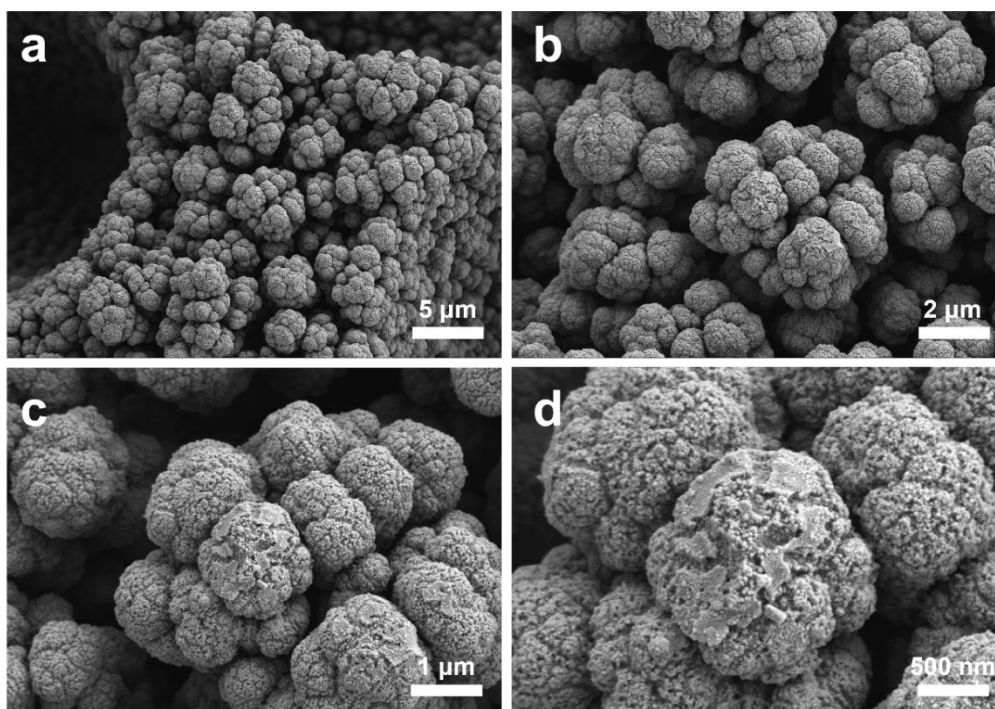

**Fig. S18.** The SEM images of the  $\text{Mo}_5\text{N}_6/\text{Ni}_3\text{N}/\text{Ni}/\text{NF}$  after chronopotentiometry measurement ( $-100 \text{ mA}/\text{cm}^2@100\text{h}$ ).

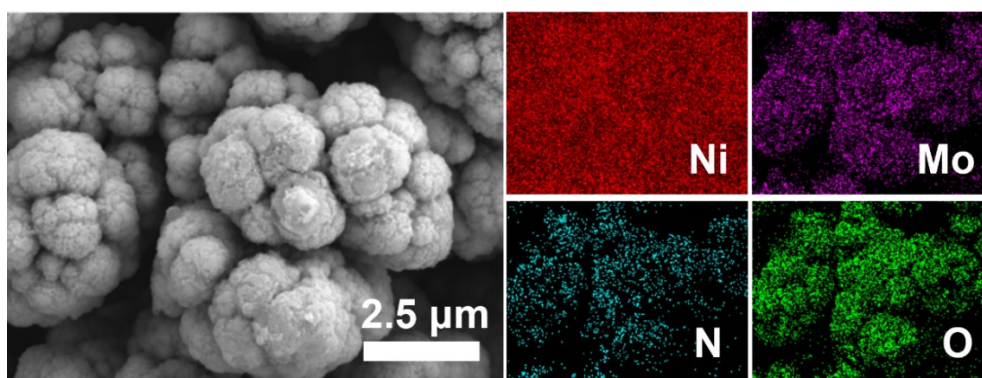

**Fig. S19.** The scanning electron microscopy image and the corresponding elemental mappings of Ni, Mo, N, and O in the  $\text{Mo}_5\text{N}_6/\text{Ni}_3\text{N}/\text{Ni}/\text{NF}$  after chronopotentiometry measurement ( $-100 \text{ mA}/\text{cm}^2@100\text{h}$ ).

**Table S1.** Elemental composition of Mo<sub>5</sub>N<sub>6</sub>/Ni<sub>3</sub>N/Ni/CF (CF is copper foam) by ICP-OES tests.

| Element | Mass fraction (%) |
|---------|-------------------|
| Ni      | 74.78             |
| Mo      | 0.71              |

**Table S2.** The atomic percentages of Ni and Mo in MoO<sub>4</sub>-Ni/NF and Mo<sub>5</sub>N<sub>6</sub>/Ni<sub>3</sub>N/Ni/NF in XPS spectra.

| MoO <sub>4</sub> -Ni/NF                                 |       |       |       |       |
|---------------------------------------------------------|-------|-------|-------|-------|
| Name                                                    | Ni 2p | Mo 3d | N 1s  | C 1s  |
| Atomic %                                                | 27.1  | 7.48  | 25.65 | 39.76 |
| Mo <sub>5</sub> N <sub>6</sub> /Ni <sub>3</sub> N/Ni/NF |       |       |       |       |
| Name                                                    | Ni 2p | Mo 3d | N 1s  | C 1s  |
| Atomic %                                                | 8.89  | 13.72 | 52.97 | 24.42 |

**Table S3.** Comparison of HER catalytic activity, stability and Tafel slope between Mo<sub>5</sub>N<sub>6</sub>/Ni<sub>3</sub>N/Ni/NF and recently reported self-supporting transition metal nitride catalysts under alkaline condition.

| Catalyst                                                   | $\eta_{10}$ (mV) | Tafel slope (mV/dec) | Stability (mA/cm <sup>2</sup> or mV for h)                   | Reference |
|------------------------------------------------------------|------------------|----------------------|--------------------------------------------------------------|-----------|
| Mo <sub>5</sub> N <sub>6</sub> /Ni <sub>3</sub> N/Ni/NF    | 27               | 46.8                 | -100 mA/cm <sup>2</sup> for 100 h                            | This work |
| NiMoN/CC                                                   | 109              | 95.0                 | -50 mA/cm <sup>2</sup> for 12 h                              | 1         |
| Nb <sub>2</sub> O <sub>5</sub> -Ni <sub>3</sub> N/NF       | 80               | 100.4                | -100 mA/cm <sup>2</sup> and -200 mA/cm <sup>2</sup> for 12 h | 2         |
| NiCo <sub>2</sub> N/NF                                     | 180              | 79.0                 | -10 mA/cm <sup>2</sup> for 50 h                              | 3         |
| NiMoN/Ni <sub>3</sub> N/NF                                 | 28               | 49.0                 | -10 mA/cm <sup>2</sup> for 24 h                              | 4         |
| Ni <sub>3</sub> N-V <sub>2</sub> O <sub>3</sub> /NF        | 57               | 50.0                 | -100 mV for 24 h                                             | 5         |
| Ni-Mo-N/CFC                                                | 40               | 70.0                 | -10 mA/cm <sup>2</sup> for 12 h                              | 6         |
| Ni <sub>3</sub> N-Mo <sub>2</sub> N/NF                     | 66               | 67.4                 | -10 mA/cm <sup>2</sup> for 48 h                              | 7         |
| Ni <sub>3</sub> N/Ni <sub>0.2</sub> Mo <sub>0.8</sub> N/NF | 55               | 54.0                 | -10 mA/cm <sup>2</sup> for 50 h                              | 8         |
| Co-Ni <sub>3</sub> N/NF                                    | 30               | 41.6                 | -50 mA/cm <sup>2</sup> for 24 h                              | 9         |
| Ni <sub>3</sub> N/W <sub>5</sub> N <sub>4</sub> /NF        | 31               | 34.0                 | -100 mA/cm <sup>2</sup> for 150 h                            | 10        |
| Co <sub>2</sub> NiN/CC                                     | 123              | 98.0                 | -100 mA/cm <sup>2</sup> for 6 h                              | 11        |
| FeOOH/Ni <sub>3</sub> N/CC                                 | 67               | 82.0                 | -10 mA/cm <sup>2</sup> for 50 h                              | 12        |
| Co/MoN/NF                                                  | 52               | 77.5                 | -40 mA/cm <sup>2</sup> for 70 h                              | 13        |
| Ni <sub>2</sub> Mo <sub>3</sub> N/NF                       | 21               | 62.0                 | -10 mA/cm <sup>2</sup> for 24 h                              | 14        |

NF: nickel foam; CC: carbon cloth; CFC: conductive carbon fiber cloth.

## References

- 1 Y. Zhang, B. Ouyang, J. Xu, S. Chen, R. S. Rawat and H. J. Fan, *Adv. Energy Mater.*, 2016, **6**, 1600221.
- 2 X. H. Chen, X. L. Li, L. L. Wu, H. C. Fu, J. Luo, L. Shen, Q. Zhang, J. L. Lei, H. Q. Luo and N. B. Li, *J. Mater. Chem. A*, 2021, **9**, 11563–11570.
- 3 Y. Wang, B. Zhang, W. Pan, H. Ma and J. Zhang, *ChemSusChem*, 2017, **10**, 4170–4177.
- 4 W. Hua, H. Sun, H. Liu, Y. Li and J.-G. Wang, *Appl. Surf. Sci.*, 2021, **540**, 148407.
- 5 P. Zhou, G. Zhai, X. Lv, Y. Liu, Z. Wang, P. Wang, Z. Zheng, H. Cheng, Y. Dai and B. Huang, *Appl. Catal., B*, 2021, **283**, 119590.
- 6 Y. Li, X. Wei, L. Chen, J. Shi and M. He, *Nat. Commun.*, 2019, **10**, 5335.
- 7 R. Dai, H. Zhang, W. Zhou, Y. Zhou, Z. Ni, J. Chen, S. Zhao, Y. Zhao, F. Yu, A. Chen, R. Wang and T. Sun, *J. Alloys Compd.*, 2022, **919**, 165862.
- 8 R.-Q. Li, X.-Y. Wan, B.-L. Chen, R.-Y. Cao, Q.-H. Ji, J. Deng, K.-G. Qu, X.-B. Wang and Y.-C. Zhu, *Chem. Eng. J.*, 2021, **409**, 128240.
- 9 M. Wang, W. Ma, Z. Lv, D. Liu, K. Jian and J. Dang, *J. Phys. Chem. Lett.*, 2021, **12**, 1581–1587.
- 10 F. Ma, S. Wang, X. Gong, X. Liu, Z. Wang, P. Wang, Y. Liu, H. Cheng, Y. Dai, Z. Zheng and B. Huang, *Appl. Catal., B*, 2022, **307**, 121198.
- 11 W. Lv, L. Xu, L. Wang, Y. Yang, L. Wang, T. Wang, D. Li, H. Shao, F. Li and X. Dong, *J. Alloys Compd.*, 2022, **920**, 165934.
- 12 J. Guan, C. Li, J. Zhao, Y. Yang, W. Zhou, Y. Wang and G.-R. Li, *Appl. Catal., B*, 2020, **269**, 118600.
- 13 J. Sun, W. Xu, C. Lv, L. Zhang, M. Shakouri, Y. Peng, Q. Wang, X. Yang, D. Yuan, M. Huang, Y. Hu, D. Yang and L. Zhang, *Appl. Catal., B*, 2021, **286**, 119882.
- 14 S. H. Park, T. H. Jo, M. H. Lee, K. Kawashima, C. B. Mullins, H.-K. Lim and D. H. Youn, *J. Mater. Chem. A*, 2021, **9**, 4945–4951.
